# Supplementary material
Source: PubMed Central journal article supplement (PMC3086792)
Supplement: NIHMS192884-supplement-01.pdf [file NIHMS192884-supplement-01.pdf]

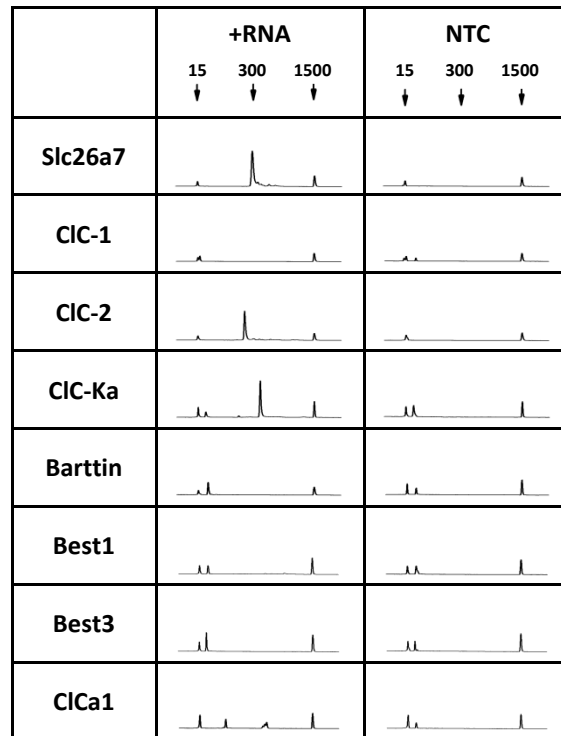

**Figure S1. Electropherograms of PCR products for Cl<sup>-</sup> channels and Cl<sup>-</sup> transporters in Reissner's membrane.**

Analyses of DNA products of RT-PCR by Agilent Bioanalyzer. Transcripts for all genes tested in column "+RNA" were present except for ClC-1, barttin, Best1, Best3; Clca1 was judged to be absent. NTC, no template controls.

**Table S1.** Gene array analysis of Cl<sup>-</sup> channel genes in Reissner's membrane

| Gene         | Affymetrix Probe Set ID | Average Signal          |                         | Ratio (RM/SV) | Present (P)<br>Marginal(M)<br>Absent (A) |
|--------------|-------------------------|-------------------------|-------------------------|---------------|------------------------------------------|
|              |                         | RM <sup>a</sup><br>Mean | SV <sup>b</sup><br>Mean |               |                                          |
| Cftr         | 1420579_s_at            | 8                       | 52                      | 0.2           | AAA/APA <sup>d</sup>                     |
| Cftr         | 1427767_a_at            | 9                       | 30                      | 0.3           | AAA/AAA <sup>d</sup>                     |
| Slc26a7      | 1425841_at              | 1909                    | 76                      | 25            | PPP/AAA                                  |
| CIC-1        | 1427591_at              | 17                      | 95                      | 0.2           | AAA/AAA                                  |
| CIC-2        | 1449248_at              | 296                     | 97                      | 3.1           | PPP/PAA                                  |
| CIC-Ka       | 1450182_at              | 362                     | 1458                    | 0.2           | PPP/PPP                                  |
| CIC-Ka       | 1455677_s_at            | 372                     | 2030                    | 0.2           | PPP/PPP                                  |
| CIC-Kb       | 1450340_a_at            | 46                      | 837                     | 0.1           | AAA/PAA <sup>c</sup>                     |
| Barttin      | 1421482_at              | 52                      | 550                     | 0.1           | AAA/AAA <sup>c</sup>                     |
| CiCa1        | 1417852_x_at            | 66                      | 104                     | 0.6           | PPP/PPM                                  |
| CiCa1        | 1417853_at              | 28                      | 31                      | 0.9           | PPA/AAA                                  |
| CiCa2        | 1419463_at              | 2                       | 107                     | 0.0           | AAA/PPA                                  |
| CiCa2        | 1437578_at              | 7                       | 10                      | 0.7           | AAA/AAA                                  |
| CiCa3        | 1416306_at              | 5                       | 6                       | 0.8           | AAA/AAA                                  |
| CiCa3        | 1459889_at              | 32                      | 95                      | 0.3           | AAA/AAA                                  |
| CiCa4        | 1451823_at              | 28                      | 94                      | 0.3           | AAA/AAA                                  |
| Best 1       | 1428841_at              | 366                     | 177                     | 2.1           | PPP/AAA                                  |
| Best 2       | 1425729_at              | 12                      | 77                      | 0.2           | AAA/AAA                                  |
| Ano1/tmem16a | 1426571_at              | 5                       | 62                      | 0.1           | AAA/AAA                                  |
| Ano1/tmem16a | 1459713_s_at            | 46                      | 414                     | 0.1           | AAA/PPP                                  |
| Clns1a       | 1423181_s_at            | 2463                    | 1913                    | 1.3           | PPP/PPP                                  |
| Clns1a       | 1427548_a_at            | 145                     | 234                     | 0.6           | PPP/PAA                                  |
| Clns1a       | 1436935_x_at            | 10426                   | 11084                   | 0.9           | PPP/PPP                                  |

Affymetrix annotation date is July 13, 2009; results are from three gene chips for each tissue; mean signal background for RM= 57, SV=100; GEO accession numbers: <sup>a</sup>GSE6196, <sup>b</sup>GSE4749. <sup>c</sup>These proteins are known to be present in SV. <sup>d</sup>Reported earlier (Kim et al., 2009).

#### Reference

Kim SH, Kim KX, Raveendran NN, Wu T, Pondugula SR, Marcus DC (2009) Regulation of ENaC-mediated sodium transport by glucocorticoids in Reissner's membrane epithelium. *Am J Physiol Cell Physiol* 296:C544-C557.
